# Supplementary material for: In situ Ti assisted graphitization approach for the preparation of graphite foam with light weight and high thermal conductivity
Source: Royal Society of Chemistry journal article supplement (doi:10.1039/d2ra06164c), 2023-01-01
Supplement: d2ra06164c1.pdf [file d2ra06164c1.pdf]

## Supporting information

### **In-situ Ti assisted graphitization approach for the preparation of graphite foam with lightweight and high thermal conductivity**

Xing Guo<sup>a,b</sup>, Yaxiong Liu<sup>a,b</sup>, Xiaodong Tian<sup>a</sup>, Zechao Tao<sup>a,b,c</sup>, Xi Yan<sup>a,b\*</sup>, Zhanjun Liu<sup>a,b,c\*</sup>

<sup>a</sup> CAS Key Laboratory of Carbon Materials, Institute of Coal Chemistry, Chinese Academy of Sciences, Taiyuan, 030001, China

<sup>b</sup> Center of Materials Science and Optoelectronics Engineering, University of Chinese Academy of Sciences, Beijing 100049, China

<sup>c</sup> Dalian National Laboratory for Clean Energy, Dalian 116023, China

\*Corresponding authors

E-mail addresses: [yanxi@sxicc.ac.cn](mailto:yanxi@sxicc.ac.cn) (Xi Yan)

(Zhanjun Liu)

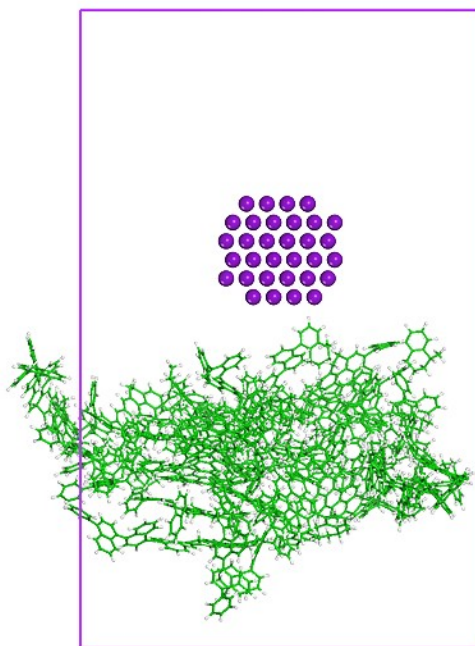

**Fig.S1.** The initial simulation cell of 20 ARMP molecules and 120 Ti atoms. C atoms shown in green, Ti in purple, and H in white.

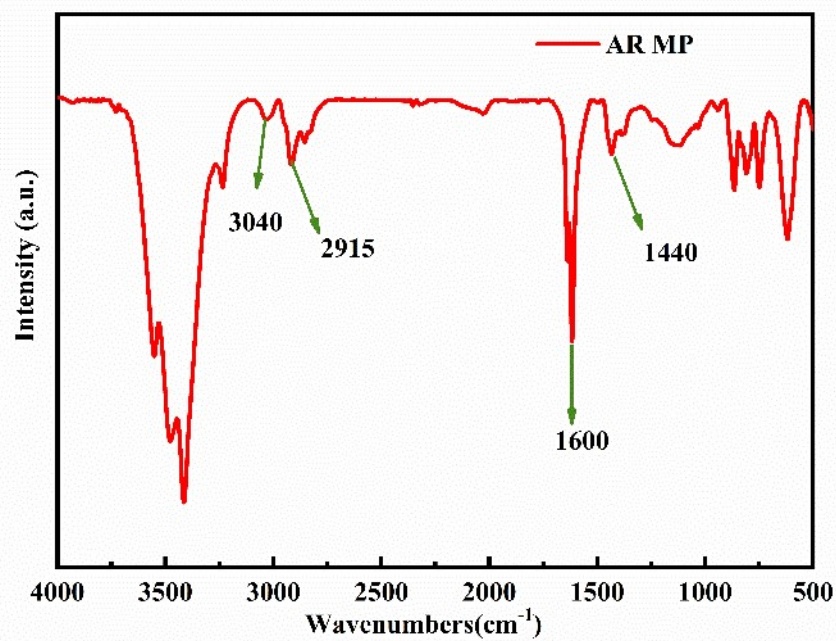

**Fig.S2.** The FTIR spectra of the ARMP.

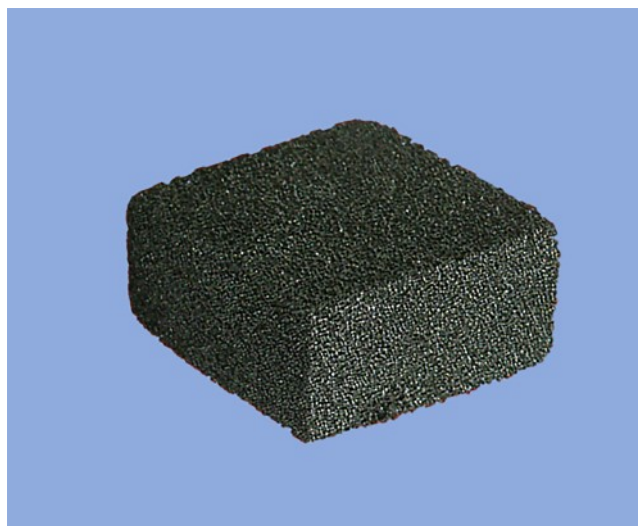

**Fig.S3.** The images of GF-11 taken from a camera

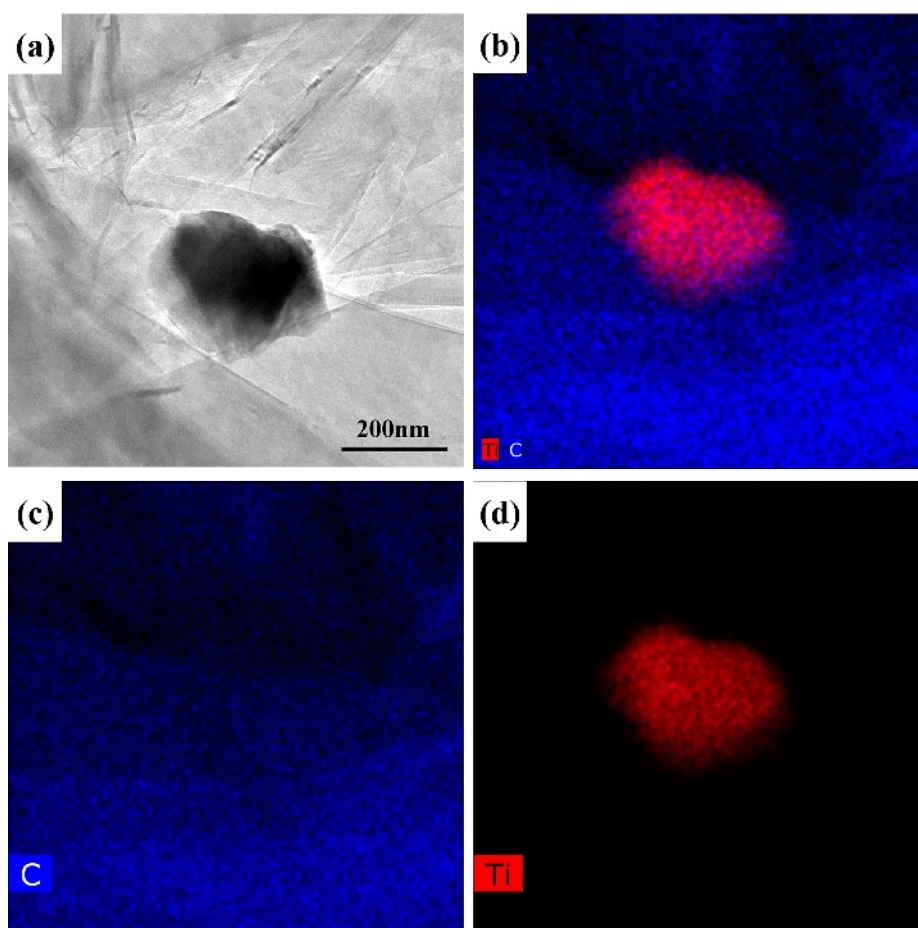

**Fig.S4.** EDS mapping analysis (a)-(d) of GF-11 from TEM.

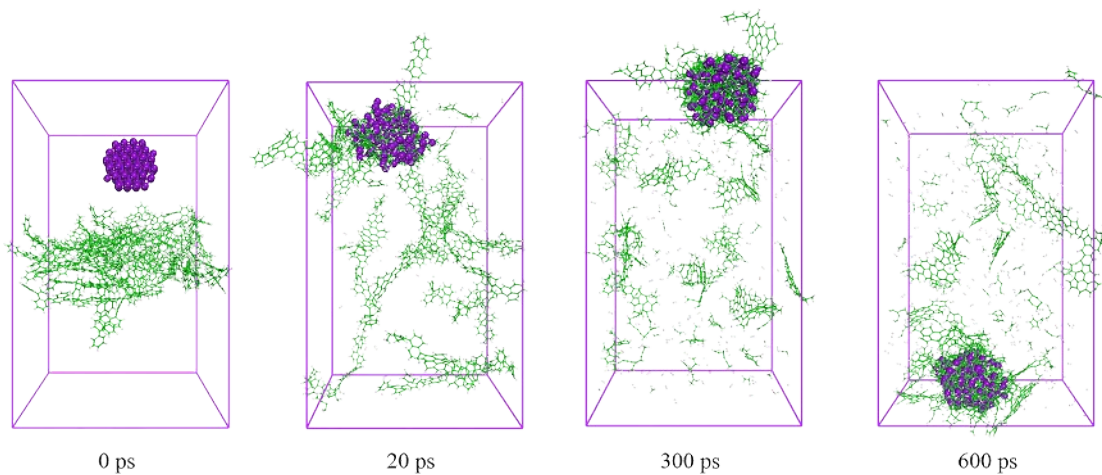

**Fig.S5.** Configurations of the model system in 600 ps ReaxFF molecular dynamics simulation.

**Table S1.** Specific heat ( $C_p$ ) of GFs.

| <b>Samples</b> | <b><math>C_p</math> (<math>J g^{-1} K^{-1}</math>)</b> |
|----------------|--------------------------------------------------------|
| GF-0           | 0.713                                                  |
| GF-3           | 0.704                                                  |
| GF-5           | 0.698                                                  |
| GF-7           | 0.685                                                  |
| GF-11          | 0.617                                                  |
| GF-15          | 0.582                                                  |

**Table S2.** Properties of mesophase pitch.

| <b>Properties</b>          | <b>Units</b> | <b>AR MP</b> |
|----------------------------|--------------|--------------|
| Softening point            | °C           | 282          |
| Toluene insoluble content  | wt. %        | 55.0         |
| Pyridine insoluble content | wt. %        | 51.5         |
| Ash content                | wt. %        | 0.03         |
| Volatile content           | wt. %        | 28.4         |
| Mesophase content          | wt. %        | 100          |

Reactive MD-force field: Ti/O/H

```
39      ! Number of general parameters
50.0000 !Overcoordination parameter
  9.5469 !Overcoordination parameter
  1.6725 !Valency angle conjugation parameter
  1.7224 !Triple bond stabilisation parameter
  6.8702 !Triple bond stabilisation parameter
60.4850 !C2-correction
  1.0588 !Undercoordination parameter
  4.6000 !Triple bond stabilisation parameter
12.1176 !Undercoordination parameter
13.3056 !Undercoordination parameter
-63.5000 !Triple bond stabilization energy
  0.0000 !Lower Taper-radius
10.0000 !Upper Taper-radius
  2.8793 !Not used
33.8667 !Valency undercoordination
  6.0891 !Valency angle/lone pair parameter
  1.0563 !Valency angle
  2.0384 !Valency angle parameter
  6.1431 !Not used
  6.9290 !Double bond/angle parameter
  0.3989 !Double bond/angle parameter: overcoord
  3.9954 !Double bond/angle parameter: overcoord
-2.4837 !Not used
  5.7796 !Torsion/BO parameter
10.0000 !Torsion overcoordination
  1.9487 !Torsion overcoordination
-1.2327 !Conjugation 0 (not used)
  2.1645 !Conjugation
  1.5591 !vdWaals shielding
  0.0100 !Cutoff for bond order (*100)
  1.7602 !Valency angle conjugation parameter
  0.6991 !Overcoordination parameter
50.0000 !Overcoordination parameter
  1.8512 !Valency/lone pair parameter
  0.5000 !Not used
20.0000 !Not used
  5.0000 !Molecular energy (not used)
  0.0000 !Molecular energy (not used)
  0.7903 !Valency angle conjugation parameter
14      ! Nr of atoms; cov.r; valency;a.m;Rvdw;Evdw;gammaEEM;cov.r2;#
        alfa;gammavdW;valency;Eunder;Eover;chiEEM;etaEEM;n.u.
        cov r3;Elp;Heat inc.;n.u.;n.u.;n.u.;n.u.
```

ov/un;vall;n. u. ;val3, vval4

|    |          |         |          |          |          |         |         |        |
|----|----------|---------|----------|----------|----------|---------|---------|--------|
| C  | 1.3674   | 4.0000  | 12.0000  | 2.0453   | 0.1444   | 0.8485  | 1.1706  | 4.0000 |
|    | 9.0000   | 1.5000  | 4.0000   | 30.0000  | 79.5548  | 4.8446  | 7.0000  | 0.0000 |
|    | 1.1168   | 0.0000  | 181.0000 | 14.2732  | 24.4406  | 6.7313  | 0.8563  | 0.0000 |
|    | -4.1021  | 5.0000  | 1.0564   | 4.0000   | 2.9663   | 0.0000  | 0.0000  | 0.0000 |
| H  | 0.8930   | 1.0000  | 1.0080   | 1.3550   | 0.0930   | 0.8203  | -0.1000 | 1.0000 |
|    | 8.2230   | 33.2894 | 1.0000   | 0.0000   | 121.1250 | 3.7248  | 9.6093  | 1.0000 |
|    | -0.1000  | 0.0000  | 55.1878  | 3.0408   | 2.4197   | 0.0003  | 1.0698  | 0.0000 |
|    | -19.4571 | 4.2733  | 1.0338   | 1.0000   | 2.8793   | 0.0000  | 0.0000  | 0.0000 |
| O  | 1.2450   | 2.0000  | 15.9990  | 2.3890   | 0.1000   | 1.0898  | 1.0548  | 6.0000 |
|    | 9.7300   | 13.8449 | 4.0000   | 37.5000  | 116.0768 | 8.5000  | 8.3122  | 2.0000 |
|    | 0.9049   | 0.4056  | 68.0152  | 3.5027   | 0.7640   | 0.0021  | 0.9745  | 0.0000 |
|    | -3.5500  | 2.9000  | 1.0493   | 4.0000   | 2.9225   | 0.0000  | 0.0000  | 0.0000 |
| N  | 1.2333   | 3.0000  | 14.0000  | 1.9324   | 0.1376   | 0.7921  | 1.1748  | 5.0000 |
|    | 10.0667  | 7.8431  | 4.0000   | 32.2482  | 100.0000 | 7.5795  | 6.3952  | 2.0000 |
|    | 1.0433   | 27.4290 | 119.9837 | 1.9457   | 4.2874   | 3.4869  | 0.9745  | 0.0000 |
|    | -4.3875  | 2.6192  | 1.0183   | 4.0000   | 2.8793   | 0.0000  | 0.0000  | 0.0000 |
| S  | 1.9405   | 2.0000  | 32.0600  | 2.0677   | 0.2099   | 1.0336  | 1.5479  | 6.0000 |
|    | 9.9575   | 4.9055  | 4.0000   | 52.9998  | 112.1416 | 5.7824  | 8.2545  | 2.0000 |
|    | 1.4601   | 9.7177  | 71.1843  | 5.7487   | 23.2859  | 12.7147 | 0.9745  | 0.0000 |
|    | -11.0000 | 2.7466  | 1.0338   | 6.2998   | 2.8793   | 0.0000  | 0.0000  | 0.0000 |
| Mg | 1.8315   | 2.0000  | 24.3050  | 2.2464   | 0.1806   | 0.5020  | 1.0000  | 2.0000 |
|    | 10.9186  | 27.1205 | 3.0000   | 38.0000  | 0.0000   | 0.9499  | 5.6130  | 0.0000 |
|    | -1.3000  | 0.0000  | 127.9160 | 49.9248  | 0.3370   | 0.0000  | 0.0000  | 0.0000 |
|    | -1.0823  | 2.3663  | 1.0564   | 6.0000   | 2.9663   | 0.0000  | 0.0000  | 0.0000 |
| P  | 1.5994   | 3.0000  | 30.9738  | 1.7000   | 0.1743   | 1.0000  | 1.3000  | 5.0000 |
|    | 9.1909   | 14.9482 | 5.0000   | 0.0000   | 0.0000   | 1.6676  | 7.0946  | 0.0000 |
|    | -1.0000  | 25.0000 | 125.6300 | 0.2187   | 21.4305  | 15.1425 | 0.0000  | 0.0000 |
|    | -3.9294  | 3.4831  | 1.0338   | 5.0000   | 2.8793   | 0.0000  | 0.0000  | 0.0000 |
| Na | 0.0001   | 1.0000  | 22.9898  | 2.6441   | 0.2588   | 0.8011  | -1.0000 | 1.0000 |
|    | 9.0003   | 2.5000  | 1.0000   | 0.0000   | 0.0000   | -3.4731 | 8.6438  | 0.0000 |
|    | -1.0000  | 0.0000  | 23.0445  | 100.0000 | 1.0000   | 0.0000  | 0.8563  | 0.0000 |
|    | -4.1479  | 3.9900  | 1.0338   | 8.0000   | 2.5791   | 0.0000  | 0.0000  | 0.0000 |
| Ti | 2.0254   | 4.0000  | 47.8800  | 2.2105   | 0.1574   | 0.6311  | 0.1000  | 4.0000 |
|    | 12.7041  | 16.6482 | 4.0000   | 0.1000   | 0.0000   | -1.3647 | 6.8406  | 0.0000 |
|    | -1.0000  | 0.0000  | 143.1770 | 27.6505  | -0.0753  | 0.0064  | 0.8563  | 0.0000 |
|    | -15.0000 | 3.8359  | 1.0338   | 12.0000  | 2.2632   | 0.0000  | 0.0000  | 0.0000 |
| Cl | 0.0014   | 1.0000  | 35.4500  | 2.0560   | 0.4000   | 0.3640  | -1.0000 | 7.0000 |
|    | 9.8895   | 10.1330 | 1.0000   | 0.0000   | 0.0000   | 7.8039  | 9.5196  | 2.0000 |
|    | -1.0000  | 0.0100  | 35.1770  | 6.2293   | 5.2294   | 0.1542  | 0.8563  | 0.0000 |
|    | -10.2080 | 2.9867  | 1.0338   | 6.2998   | 2.5791   | 0.0000  | 0.0000  | 0.0000 |
| F  | 1.1846   | 1.0000  | 18.9984  | 1.7922   | 0.1267   | 0.4038  | -0.1000 | 7.0000 |
|    | 10.3184  | 7.5000  | 1.0000   | 9.2533   | 0.2000   | 9.3891  | 6.5612  | 2.0000 |
|    | -1.0000  | 3.5571  | 18.0000  | 6.9821   | 4.1799   | 1.0561  | 0.0000  | 0.0000 |

|    |                                                         |          |          |          |          |         |         |          |         |
|----|---------------------------------------------------------|----------|----------|----------|----------|---------|---------|----------|---------|
|    |                                                         | -7.3000  | 2.6656   | 1.0493   | 4.0000   | 2.9225  | 0.0000  | 0.0000   | 0.0000  |
| K  |                                                         | 0.0001   | 1.0000   | 39.0983  | 2.6480   | 0.1676  | 0.3343  | -1.0000  | 1.0000  |
|    |                                                         | 9.0047   | 2.5000   | 1.0000   | 0.0000   | 0.0000  | -5.0000 | 10.4546  | 0.0000  |
|    |                                                         | -1.0000  | 0.0000   | 23.0445  | 100.0000 | 1.0000  | 0.0000  | 0.8563   | 0.0000  |
|    |                                                         | -2.5000  | 3.9900   | 1.0338   | 8.0000   | 2.5791  | 0.0000  | 0.0000   | 0.0000  |
| Li |                                                         | 0.0001   | 1.0000   | 6.9410   | 2.6000   | 0.0865  | 0.8380  | -0.1000  | 1.0000  |
|    |                                                         | 9.6984   | 1.4649   | 1.0000   | 0.0000   | 0.0000  | -4.0561 | 9.7698   | 0.0000  |
|    |                                                         | -1.0000  | 0.0000   | 37.5000  | 5.4409   | 6.9107  | 0.1973  | 0.8563   | 0.0000  |
|    |                                                         | -24.7916 | 2.2989   | 1.0338   | 1.0000   | 2.8103  | 1.3000  | 0.2000   | 13.0000 |
| X  |                                                         | -0.1000  | 2.0000   | 1.0080   | 2.0000   | 0.0000  | 0.0100  | -0.1000  | 6.0000  |
|    |                                                         | 10.0000  | 2.5000   | 4.0000   | 0.0000   | 0.0000  | 5.0000  | 9999.999 | 0.0000  |
|    |                                                         | -0.1000  | 0.0000   | -2.3700  | 8.7410   | 13.3640 | 0.6690  | 0.9745   | 0.0000  |
|    |                                                         | -11.0000 | 2.7466   | 1.0338   | 2.0000   | 2.8793  | 0.0000  | 0.0000   | 0.0000  |
| 71 | ! Nr of bonds; Edis1;LPpen;n. u. ;pbe1;pbo5;l3corr;pbo6 |          |          |          |          |         |         |          |         |
|    | pbe2;pbo3;pbo4;Etrip;pbo1;pbo2;ovcorr                   |          |          |          |          |         |         |          |         |
| 1  | 1                                                       | 80.8865  | 107.9944 | 52.0636  | 0.5218   | -0.3636 | 1.0000  | 34.9876  | 0.7769  |
|    |                                                         | 6.1244   | -0.1693  | 8.0804   | 1.0000   | -0.0586 | 8.1850  | 1.0000   | 0.0000  |
| 1  | 2                                                       | 180.6309 | 0.0000   | 0.0000   | -0.4794  | 0.0000  | 1.0000  | 6.0000   | 0.6281  |
|    |                                                         | 12.2202  | 1.0000   | 0.0000   | 1.0000   | -0.0670 | 6.8158  | 0.0000   | 0.0000  |
| 2  | 2                                                       | 153.3934 | 0.0000   | 0.0000   | -0.4600  | 0.0000  | 1.0000  | 6.0000   | 0.7300  |
|    |                                                         | 6.2500   | 1.0000   | 0.0000   | 1.0000   | -0.0790 | 6.0552  | 0.0000   | 0.0000  |
| 1  | 3                                                       | 163.3110 | 83.9973  | 54.4316  | -0.5220  | -0.3123 | 1.0000  | 10.2503  | 1.0000  |
|    |                                                         | 0.3553   | -0.3757  | 7.0000   | 1.0000   | -0.1331 | 4.6021  | 0.0000   | 0.0000  |
| 3  | 3                                                       | 142.2858 | 145.0000 | 50.8293  | 0.2506   | -0.1000 | 1.0000  | 29.7503  | 0.6051  |
|    |                                                         | 0.3451   | -0.1055  | 9.0000   | 1.0000   | -0.1225 | 5.5000  | 1.0000   | 0.0000  |
| 1  | 4                                                       | 134.1215 | 140.2179 | 79.9745  | 0.0163   | -0.1428 | 1.0000  | 27.0617  | 0.2000  |
|    |                                                         | 0.1387   | -0.3681  | 7.1611   | 1.0000   | -0.1000 | 5.0825  | 1.0000   | 0.0000  |
| 3  | 4                                                       | 130.8596 | 169.4551 | 40.0000  | 0.3837   | -0.1639 | 1.0000  | 35.0000  | 0.2000  |
|    |                                                         | 1.0000   | -0.3579  | 7.0004   | 1.0000   | -0.1193 | 6.8773  | 1.0000   | 0.0000  |
| 4  | 4                                                       | 157.9384 | 82.5526  | 152.5336 | 0.4010   | -0.1034 | 1.0000  | 12.4261  | 0.5828  |
|    |                                                         | 0.1578   | -0.1509  | 11.9186  | 1.0000   | -0.0861 | 5.4271  | 1.0000   | 0.0000  |
| 2  | 3                                                       | 160.0000 | 0.0000   | 0.0000   | -0.5725  | 0.0000  | 1.0000  | 6.0000   | 0.5626  |
|    |                                                         | 1.1150   | 1.0000   | 0.0000   | 0.0000   | -0.0920 | 4.2790  | 0.0000   | 0.0000  |
| 2  | 4                                                       | 185.3171 | 0.0000   | 0.0000   | -0.3689  | 0.0000  | 1.0000  | 6.0000   | 0.2854  |
|    |                                                         | 7.6517   | 1.0000   | 0.0000   | 1.0000   | -0.0408 | 6.0255  | 0.0000   | 0.0000  |
| 1  | 5                                                       | 128.7959 | 56.4134  | 39.0716  | 0.0688   | -0.4463 | 1.0000  | 31.1766  | 0.4530  |
|    |                                                         | 0.1955   | -0.3587  | 6.2148   | 1.0000   | -0.0770 | 6.6386  | 1.0000   | 0.0000  |
| 2  | 5                                                       | 136.1049 | 0.0000   | 0.0000   | -0.4669  | 0.0000  | 1.0000  | 6.0000   | 0.3803  |
|    |                                                         | 10.5730  | 1.0000   | 0.0000   | 1.0000   | -0.1000 | 7.0000  | 1.0000   | 0.0000  |
| 3  | 5                                                       | 135.6998 | 220.0000 | 40.0000  | 0.5848   | -0.2406 | 1.0000  | 22.1005  | 0.2335  |
|    |                                                         | 0.7069   | -0.2681  | 8.3465   | 1.0000   | -0.0922 | 5.4651  | 1.0000   | 0.0000  |
| 4  | 5                                                       | 0.0000   | 0.0000   | 0.0000   | 0.5000   | -0.2000 | 1.0000  | 40.0000  | 0.3000  |
|    |                                                         | 0.4000   | -0.2500  | 9.0000   | 1.0000   | -0.1000 | 6.0000  | 1.0000   | 0.0000  |
| 5  | 5                                                       | 0.0000   | 0.0000   | 0.0000   | 0.2500   | -0.5000 | 1.0000  | 20.0000  | 1.0000  |



|   |   |          |          |         |         |         |         |         |         |
|---|---|----------|----------|---------|---------|---------|---------|---------|---------|
|   |   | 0.2500   | -0.2500  | 10.0000 | 1.0000  | -0.1000 | 8.0000  | 1.0000  | 0.0000  |
| 2 | 6 | 58.6896  | 0.0000   | 0.0000  | -0.0203 | -0.1418 | 1.0000  | 13.1260 | 0.0230  |
|   |   | 8.2136   | -0.1310  | 0.0000  | 1.0000  | -0.2692 | 6.4254  | 0.0000  | 24.4461 |
| 3 | 6 | 87.0227  | 0.0000   | 43.3991 | 0.0030  | -0.3000 | 1.0000  | 36.0000 | 0.0250  |
|   |   | 0.0087   | -0.2500  | 12.0000 | 1.0000  | -0.0439 | 6.6073  | 1.0000  | 24.4461 |
| 6 | 6 | 32.3808  | 0.0000   | 0.0000  | -0.0076 | -0.2000 | 0.0000  | 16.0000 | 0.2641  |
|   |   | 4.8726   | -0.2000  | 10.0000 | 1.0000  | -0.0729 | 4.6319  | 0.0000  | 0.0000  |
| 1 | 7 | 110.0000 | 92.0000  | 0.0000  | 0.2171  | -0.1418 | 1.0000  | 13.1260 | 0.6000  |
|   |   | 0.3601   | -0.1310  | 10.7257 | 1.0000  | -0.0869 | 5.3302  | 1.0000  | 0.0000  |
| 2 | 7 | 0.1466   | 0.0000   | 0.0000  | 0.2250  | -0.1418 | 1.0000  | 13.1260 | 0.6000  |
|   |   | 0.3912   | -0.1310  | 0.0000  | 1.0000  | -0.1029 | 9.3302  | 0.0000  | 0.0000  |
| 3 | 7 | 201.0058 | 194.1410 | 0.0000  | 1.0000  | -0.5000 | 1.0000  | 25.0000 | 0.4873  |
|   |   | 0.4358   | -0.1571  | 15.8745 | 1.0000  | -0.2431 | 6.3823  | 1.0000  | 0.0000  |
| 4 | 7 | 130.0000 | 0.0000   | 0.0000  | 0.2171  | -0.1418 | 1.0000  | 13.1260 | 0.6000  |
|   |   | 0.3601   | -0.1310  | 10.7257 | 1.0000  | -0.0869 | 5.3302  | 1.0000  | 0.0000  |
| 6 | 7 | 0.1000   | 0.0000   | 0.0000  | 0.2500  | -0.5000 | 1.0000  | 35.0000 | 0.6000  |
|   |   | 0.5000   | -0.5000  | 20.0000 | 1.0000  | -0.2000 | 10.0000 | 1.0000  | 0.0000  |
| 7 | 7 | 0.0000   | 0.0000   | 0.0000  | 0.2171  | -0.5000 | 1.0000  | 35.0000 | 0.6000  |
|   |   | 0.5000   | -0.5000  | 20.0000 | 1.0000  | -0.2000 | 10.0000 | 1.0000  | 0.0000  |
| 1 | 8 | 0.0000   | 0.0000   | 0.0000  | 0.5000  | -0.3000 | 1.0000  | 16.0000 | 0.5000  |
|   |   | 0.5000   | -0.2500  | 15.0000 | 1.0000  | -0.1000 | 9.0000  | 0.0000  | 0.0000  |
| 2 | 8 | 26.7569  | 0.0000   | 0.0000  | 1.0000  | -0.3000 | 1.0000  | 36.0000 | 0.0100  |
|   |   | 0.5785   | -0.3500  | 25.0000 | 1.0000  | -0.2601 | 6.6137  | 1.0000  | 0.0000  |
| 3 | 8 | 27.9718  | 0.0000   | 0.0000  | 0.0437  | -0.3000 | 1.0000  | 36.0000 | 0.0100  |
|   |   | 19.6220  | -0.3500  | 25.0000 | 1.0000  | -0.1279 | 7.3318  | 1.0000  | 0.0000  |
| 4 | 8 | 0.0000   | 0.0000   | 0.0000  | -1.0000 | -0.3000 | 1.0000  | 36.0000 | 0.7000  |
|   |   | 10.1151  | -0.3500  | 25.0000 | 1.0000  | -0.1053 | 8.2003  | 1.0000  | 0.0000  |
| 5 | 8 | 0.0000   | 0.0000   | 0.0000  | -1.0000 | -0.3000 | 1.0000  | 36.0000 | 0.7000  |
|   |   | 10.1151  | -0.3500  | 25.0000 | 1.0000  | -0.1053 | 8.2003  | 1.0000  | 0.0000  |
| 6 | 8 | 0.0000   | 0.0000   | 0.0000  | 0.2500  | -0.5000 | 1.0000  | 35.0000 | 0.6000  |
|   |   | 0.5000   | -0.5000  | 20.0000 | 1.0000  | -0.2000 | 10.0000 | 1.0000  | 0.0000  |
| 7 | 8 | 0.0000   | 0.0000   | 0.0000  | 0.2500  | -0.5000 | 1.0000  | 35.0000 | 0.6000  |
|   |   | 0.5000   | -0.5000  | 20.0000 | 1.0000  | -0.2000 | 10.0000 | 1.0000  | 0.0000  |
| 8 | 8 | 0.0000   | 0.0000   | 0.0000  | -0.7273 | 0.3000  | 0.0000  | 25.0000 | 0.1919  |
|   |   | 6.6441   | -0.4000  | 12.0000 | 1.0000  | -0.0345 | 5.0063  | 0.0000  | 0.0000  |
| 4 | 6 | 50.0000  | 10.0901  | 0.0000  | -1.0000 | -0.3000 | 1.0000  | 36.0000 | 0.7058  |
|   |   | 0.8567   | -0.3487  | 17.4990 | 1.0000  | -0.0794 | 8.2232  | 1.0000  | 0.0000  |
| 1 | 9 | 135.3583 | 0.0000   | 0.0000  | 1.0000  | -0.3000 | 0.0000  | 36.0000 | 0.0174  |
|   |   | 0.0550   | -0.2818  | 16.1571 | 1.0000  | -0.1093 | 6.6103  | 0.0000  | 0.0000  |
| 2 | 9 | 0.0000   | 0.0000   | 0.0000  | -0.2872 | -0.3000 | 1.0000  | 36.0000 | 0.0082  |
|   |   | 1.7973   | -0.2500  | 20.0000 | 1.0000  | -0.2578 | 6.5219  | 1.0000  | 0.0000  |
| 3 | 9 | 130.5629 | 37.6984  | 0.0000  | 0.9228  | -0.3000 | 0.0000  | 36.0000 | 0.0850  |
|   |   | 0.1150   | -0.2818  | 16.1571 | 1.0000  | -0.1343 | 6.8264  | 0.0000  | 0.0000  |
| 4 | 9 | 0.0000   | 0.0000   | 0.0000  | -0.2872 | -0.3000 | 1.0000  | 36.0000 | 0.0082  |

|    |    |          |         |         |         |         |         |         |        |
|----|----|----------|---------|---------|---------|---------|---------|---------|--------|
|    |    | 1.7973   | -0.2500 | 20.0000 | 1.0000  | -0.2578 | 6.5219  | 1.0000  | 0.0000 |
| 5  | 9  | 0.0000   | 0.0000  | 0.0000  | -0.2872 | -0.3000 | 1.0000  | 36.0000 | 0.0082 |
|    |    | 1.7973   | -0.2500 | 20.0000 | 1.0000  | -0.2578 | 6.5219  | 1.0000  | 0.0000 |
| 6  | 9  | 0.0000   | 0.0000  | 0.0000  | -0.2872 | -0.3000 | 1.0000  | 36.0000 | 0.0082 |
|    |    | 1.7973   | -0.2500 | 20.0000 | 1.0000  | -0.2578 | 6.5219  | 1.0000  | 0.0000 |
| 7  | 9  | 0.0000   | 0.0000  | 0.0000  | -0.2872 | -0.3000 | 1.0000  | 36.0000 | 0.0082 |
|    |    | 1.7973   | -0.2500 | 20.0000 | 1.0000  | -0.2578 | 6.5219  | 1.0000  | 0.0000 |
| 8  | 9  | 0.1000   | 0.0000  | 0.0000  | 0.2500  | -0.5000 | 1.0000  | 35.0000 | 0.6000 |
|    |    | 0.5000   | -0.5000 | 20.0000 | 1.0000  | -0.2000 | 10.0000 | 1.0000  | 0.0000 |
| 9  | 9  | 80.1930  | 0.0000  | 0.0000  | -0.8469 | -0.2000 | 0.0000  | 16.0000 | 0.2022 |
|    |    | 0.7528   | -0.1924 | 14.9725 | 1.0000  | -0.0885 | 5.0000  | 0.0000  | 0.0000 |
| 1  | 10 | 213.3489 | 0.0000  | 0.0000  | -0.5450 | -0.5000 | 1.0000  | 35.0000 | 0.7833 |
|    |    | 5.4257   | -0.2500 | 15.0000 | 1.0000  | -0.0827 | 5.9023  | 1.0000  | 0.0000 |
| 2  | 10 | 150.6697 | 0.0000  | 0.0000  | -0.6499 | -0.2000 | 0.0000  | 16.0000 | 0.8645 |
|    |    | 3.8414   | -0.2000 | 15.0000 | 1.0000  | -0.2000 | 6.8063  | 0.0000  | 0.0000 |
| 3  | 10 | 0.0000   | 0.0000  | 0.0000  | 0.5000  | -0.2000 | 0.0000  | 16.0000 | 0.5000 |
|    |    | 1.0001   | -0.2000 | 15.0000 | 1.0000  | -0.1000 | 15.0000 | 0.0000  | 0.0000 |
| 10 | 10 | 148.6765 | 0.0000  | 0.0000  | 0.7040  | -0.3500 | 0.0000  | 25.0000 | 0.9428 |
|    |    | -0.3546  | -0.2500 | 15.0000 | 1.0000  | -0.1329 | 7.0417  | 0.0000  | 0.0000 |
| 4  | 10 | 0.0000   | 0.0000  | 0.0000  | 0.5000  | -0.2000 | 0.0000  | 16.0000 | 0.5000 |
|    |    | 1.0001   | -0.2000 | 15.0000 | 1.0000  | -0.1000 | 10.0000 | 0.0000  | 0.0000 |
| 5  | 10 | 0.0000   | 0.0000  | 0.0000  | 0.5000  | -0.2000 | 0.0000  | 16.0000 | 0.5000 |
|    |    | 1.0001   | -0.2000 | 15.0000 | 1.0000  | -0.1000 | 10.0000 | 0.0000  | 0.0000 |
| 6  | 10 | 0.0000   | 0.0000  | 0.0000  | 0.5000  | -0.2000 | 0.0000  | 16.0000 | 0.5000 |
|    |    | 1.0001   | -0.2000 | 15.0000 | 1.0000  | -0.1000 | 10.0000 | 0.0000  | 0.0000 |
| 7  | 10 | 0.0000   | 0.0000  | 0.0000  | 0.5000  | -0.2000 | 0.0000  | 16.0000 | 0.5000 |
|    |    | 1.0001   | -0.2000 | 15.0000 | 1.0000  | -0.1000 | 10.0000 | 0.0000  | 0.0000 |
| 8  | 10 | 0.0000   | 0.0000  | 0.0000  | 0.5000  | -0.2000 | 0.0000  | 16.0000 | 0.5000 |
|    |    | 1.0001   | -0.2000 | 15.0000 | 1.0000  | -0.1000 | 10.0000 | 0.0000  | 0.0000 |
| 9  | 10 | 0.0000   | 0.0000  | 0.0000  | -0.0830 | -0.2000 | 0.0000  | 16.0000 | 0.5483 |
|    |    | 0.1065   | -0.2000 | 15.0000 | 1.0000  | -0.0553 | 8.5063  | 0.0000  | 0.0000 |
| 1  | 11 | 237.8781 | 0.0000  | 0.0000  | -0.7438 | -0.5000 | 1.0000  | 35.0000 | 1.0460 |
|    |    | 3.6661   | -0.2500 | 15.0000 | 1.0000  | -0.0800 | 5.4719  | 1.0000  | 0.0000 |
| 2  | 11 | 154.6080 | 0.0000  | 0.0000  | -0.1948 | -0.2000 | 0.0000  | 16.0000 | 0.1676 |
|    |    | 16.3699  | -0.2000 | 15.0000 | 1.0000  | -0.2265 | 7.1308  | 0.0000  | 0.0000 |
| 3  | 11 | 0.0000   | 0.0000  | 0.0000  | -0.4643 | 0.0000  | 1.0000  | 6.0000  | 0.6151 |
|    |    | 12.3710  | 1.0000  | 0.0000  | 1.0000  | -0.1008 | 8.5980  | 0.0000  | 0.0000 |
| 4  | 11 | 0.0000   | 0.0000  | 0.0000  | -0.4643 | 0.0000  | 1.0000  | 6.0000  | 0.6151 |
|    |    | 12.3710  | 1.0000  | 0.0000  | 1.0000  | -0.1008 | 8.5980  | 0.0000  | 0.0000 |
| 5  | 11 | 0.0000   | 0.0000  | 0.0000  | -0.4643 | 0.0000  | 1.0000  | 6.0000  | 0.6151 |
|    |    | 12.3710  | 1.0000  | 0.0000  | 1.0000  | -0.1008 | 8.5980  | 0.0000  | 0.0000 |
| 11 | 11 | 109.0438 | 0.0000  | 0.0000  | 0.6382  | -0.3500 | 1.0000  | 25.0000 | 1.1695 |
|    |    | 0.1254   | -0.2500 | 15.0000 | 1.0000  | -0.1062 | 5.9666  | 1.0000  | 0.0000 |
| 9  | 11 | 194.0978 | 0.0000  | 0.0000  | -0.9855 | -0.2000 | 0.0000  | 16.0000 | 0.4118 |

|    |                                                            |         |         |         |         |         |         |         |        |
|----|------------------------------------------------------------|---------|---------|---------|---------|---------|---------|---------|--------|
|    |                                                            | 1.0000  | -0.2000 | 15.0000 | 1.0000  | -0.0715 | 6.0975  | 0.0000  | 0.0000 |
| 1  | 12                                                         | 0.0000  | 0.0000  | 0.0000  | 0.5000  | -0.3000 | 1.0000  | 16.0000 | 0.5000 |
|    |                                                            | 0.5000  | -0.2500 | 15.0000 | 1.0000  | -0.1000 | 9.0000  | 0.0000  | 0.0000 |
| 2  | 12                                                         | 0.0000  | 0.0000  | 0.0000  | -1.0000 | -0.3000 | 1.0000  | 36.0000 | 0.7000 |
|    |                                                            | 10.1151 | -0.3500 | 25.0000 | 1.0000  | -0.1053 | 8.2003  | 1.0000  | 0.0000 |
| 3  | 12                                                         | 22.6146 | 0.0000  | 43.0000 | 0.6651  | -0.3000 | 1.0000  | 36.0000 | 1.0000 |
|    |                                                            | 0.9166  | -0.3500 | 25.0000 | 1.0000  | -0.0583 | 7.3861  | 1.0000  | 0.0000 |
| 10 | 12                                                         | 18.4962 | 0.0000  | 0.0000  | -0.3256 | -0.2000 | 0.0000  | 16.0000 | 0.0900 |
|    |                                                            | 2.4852  | -0.2000 | 15.0000 | 1.0000  | -0.0723 | 6.3893  | 0.0000  | 0.0000 |
| 12 | 12                                                         | 0.0000  | 0.0000  | 0.0000  | 0.3272  | 0.3000  | 0.0000  | 25.0000 | 0.5944 |
|    |                                                            | 0.9915  | -0.4000 | 12.0000 | 1.0000  | -0.0517 | 4.5075  | 0.0000  | 0.0000 |
| 9  | 12                                                         | 0.0000  | 0.0000  | 0.0000  | 0.5000  | -0.3000 | 0.0000  | 16.0000 | 0.5000 |
|    |                                                            | 0.5000  | -0.2500 | 15.0000 | 1.0000  | -0.1000 | 9.0000  | 0.0000  | 0.0000 |
| 2  | 13                                                         | 0.0000  | 0.0000  | 0.0000  | 1.0000  | -0.3000 | 1.0000  | 36.0000 | 0.0100 |
|    |                                                            | 0.3415  | -0.3500 | 25.0000 | 1.0000  | -0.2770 | 6.4396  | 1.0000  | 0.0000 |
| 3  | 13                                                         | 71.3512 | -0.0200 | 0.0000  | 0.6715  | 0.3000  | 0.0000  | 6.0000  | 0.1621 |
|    |                                                            | 0.1284  | -0.2500 | 11.9965 | 1.0000  | -0.1026 | 5.8179  | 0.0000  | 0.0000 |
| 10 | 13                                                         | 39.6304 | 0.0000  | 0.0000  | -0.6878 | -0.3000 | 1.0000  | 16.0000 | 0.4891 |
|    |                                                            | 1.8957  | -0.2500 | 15.0000 | 1.0000  | -0.0471 | 5.0000  | 0.0000  | 0.0000 |
| 13 | 13                                                         | 0.0000  | 0.0000  | 0.0000  | 0.3228  | 0.3000  | 0.0000  | 26.0000 | 0.6003 |
|    |                                                            | 1.7161  | 0.0000  | 12.0000 | 1.0000  | -0.1015 | 4.0000  | 0.0000  | 0.0000 |
| 1  | 13                                                         | 0.0000  | 0.0000  | 0.0000  | 0.3228  | 0.3000  | 0.0000  | 26.0000 | 0.6003 |
|    |                                                            | 1.7161  | 0.0000  | 12.0000 | 1.0000  | -0.1015 | 4.0000  | 0.0000  | 0.0000 |
| 9  | 13                                                         | 0.0000  | 0.0000  | 0.0000  | 0.3228  | 0.3000  | 0.0000  | 26.0000 | 0.6003 |
|    |                                                            | 1.7161  | 0.0000  | 12.0000 | 1.0000  | -0.1015 | 4.0000  | 0.0000  | 0.0000 |
| 37 | ! Nr of off-diagonal terms; Ediss;Ro;gamma;rsigma;rpi;rpi2 |         |         |         |         |         |         |         |        |
| 1  | 2                                                          | 0.1200  | 1.3861  | 9.8561  | 1.1254  | -1.0000 | -1.0000 |         |        |
| 2  | 3                                                          | 0.0283  | 1.2885  | 10.9190 | 0.9215  | -1.0000 | -1.0000 |         |        |
| 2  | 4                                                          | 0.0687  | 1.5130  | 10.0094 | 0.9412  | -1.0000 | -1.0000 |         |        |
| 1  | 3                                                          | 0.1347  | 1.8343  | 9.7934  | 1.3139  | 1.1498  | 1.1039  |         |        |
| 1  | 4                                                          | 0.1447  | 1.8766  | 9.7990  | 1.3436  | 1.1885  | 1.1363  |         |        |
| 3  | 4                                                          | 0.1048  | 2.0003  | 10.1220 | 1.3173  | 1.1096  | 1.0206  |         |        |
| 1  | 5                                                          | 0.1408  | 1.8161  | 9.9393  | 1.7986  | 1.3021  | 1.4031  |         |        |
| 2  | 5                                                          | 0.0895  | 1.6239  | 10.0104 | 1.4640  | -1.0000 | -1.0000 |         |        |
| 3  | 5                                                          | 0.1962  | 1.7872  | 10.2319 | 1.4622  | 1.4025  | -1.0000 |         |        |
| 4  | 5                                                          | 0.1505  | 1.9000  | 10.5104 | 1.8000  | 1.4000  | -1.0000 |         |        |
| 2  | 6                                                          | 0.0100  | 1.6000  | 13.2979 | 1.8670  | -1.0000 | -1.0000 |         |        |
| 3  | 6                                                          | 0.0809  | 1.7000  | 11.4606 | 1.5177  | -1.0000 | -1.0000 |         |        |
| 3  | 7                                                          | 0.0534  | 1.7520  | 10.4281 | 1.8000  | 1.4498  | -1.0000 |         |        |
| 6  | 7                                                          | 0.1801  | 1.8566  | 9.8498  | 0.1000  | -1.0000 | -1.0000 |         |        |
| 1  | 8                                                          | 0.2000  | 1.8500  | 11.0000 | -1.0000 | -1.0000 | -1.0000 |         |        |
| 2  | 8                                                          | 0.1100  | 1.8410  | 9.1430  | 1.7735  | -1.0000 | -1.0000 |         |        |
| 3  | 8                                                          | 0.1536  | 1.6000  | 12.9050 | 1.6436  | -1.0000 | -1.0000 |         |        |
| 2  | 9                                                          | 0.1750  | 1.7939  | 13.5000 | 1.1000  | -1.0000 | -1.0000 |         |        |

|     |    |                                                  |         |         |         |          |         |         |        |
|-----|----|--------------------------------------------------|---------|---------|---------|----------|---------|---------|--------|
| 3   | 9  | 0.1200                                           | 1.8000  | 10.5000 | 1.6526  | 1.4718   | -1.0000 |         |        |
| 10  | 9  | 0.1368                                           | 2.2000  | 12.5000 | 1.8549  | 1.4718   | -1.0000 |         |        |
| 1   | 9  | 0.2497                                           | 1.9709  | 11.2424 | 1.6312  | -1.0000  | -1.0000 |         |        |
| 1   | 10 | 0.1388                                           | 1.7970  | 11.9405 | 1.5598  | -1.0000  | -1.0000 |         |        |
| 2   | 10 | 0.1695                                           | 1.6156  | 9.7834  | 1.4740  | -1.0000  | -1.0000 |         |        |
| 3   | 10 | 0.1491                                           | 2.3500  | 10.1159 | -1.0000 | -1.0000  | -1.0000 |         |        |
| 1   | 11 | 0.1046                                           | 1.6238  | 11.0397 | 1.5000  | -1.0000  | -1.0000 |         |        |
| 2   | 11 | 0.0553                                           | 1.7443  | 9.0006  | 1.3514  | -1.0000  | -1.0000 |         |        |
| 9   | 11 | 0.1049                                           | 1.6192  | 12.4193 | 1.7484  | 1.4718   | -1.0000 |         |        |
| 1   | 12 | 0.2000                                           | 1.8500  | 11.0000 | -1.0000 | -1.0000  | -1.0000 |         |        |
| 2   | 12 | 0.3000                                           | 1.5647  | 13.3924 | -1.0000 | -1.0000  | -1.0000 |         |        |
| 3   | 12 | 0.1832                                           | 1.7503  | 12.6152 | 1.6986  | -1.0000  | -1.0000 |         |        |
| 10  | 12 | 0.2428                                           | 2.0950  | 11.0672 | 2.0182  | -1.0000  | -1.0000 |         |        |
| 9   | 12 | 0.2000                                           | 1.8500  | 11.0000 | -1.0000 | -1.0000  | -1.0000 |         |        |
| 2   | 13 | 0.5000                                           | 1.4607  | 13.0000 | -1.0000 | -1.0000  | -1.0000 |         |        |
| 3   | 13 | 0.0696                                           | 1.8520  | 10.0874 | 1.5559  | -1.0000  | 1.0000  |         |        |
| 10  | 13 | 0.2331                                           | 1.6173  | 12.1979 | 1.7675  | -1.0000  | -1.0000 |         |        |
| 9   | 13 | 0.0200                                           | 1.8000  | 9.0000  | -1.0000 | -1.0000  | -1.0000 |         |        |
| 8   | 9  | 0.4404                                           | 1.8207  | 12.5000 | 0.0100  | -1.0000  | -1.0000 |         |        |
| 114 |    | ! Nr of angles;at1;at2;at3;Theta,o;ka;kb;pv1;pv2 |         |         |         |          |         |         |        |
| 1   | 1  | 1                                                | 74.9085 | 44.7514 | 0.9144  | 0.0000   | 0.0050  | 0.3556  | 2.5715 |
| 1   | 1  | 2                                                | 68.0294 | 13.4722 | 5.5819  | 0.0000   | 0.6849  | 0.0000  | 1.0031 |
| 2   | 1  | 2                                                | 68.4575 | 22.1235 | 1.2937  | 0.0000   | 3.0000  | 0.0000  | 1.5009 |
| 1   | 2  | 2                                                | 0.0000  | 0.0000  | 6.0000  | 0.0000   | 0.0000  | 0.0000  | 1.0400 |
| 1   | 2  | 1                                                | 0.0000  | 7.5000  | 5.0000  | 0.0000   | 0.0000  | 0.0000  | 1.0400 |
| 2   | 2  | 2                                                | 0.0000  | 27.9213 | 5.8635  | 0.0000   | 0.0000  | 0.0000  | 1.0400 |
| 1   | 1  | 3                                                | 15.7798 | 9.0805  | 4.0304  | 0.0000   | 1.8785  | 70.0000 | 1.1737 |
| 2   | 1  | 3                                                | 65.0000 | 13.4505 | 1.8249  | 0.0000   | 1.5646  | 0.0000  | 1.2173 |
| 3   | 1  | 3                                                | 74.7266 | 45.0000 | 1.8020  | -16.7178 | 2.6091  | 0.1000  | 2.3556 |
| 1   | 1  | 4                                                | 78.5538 | 21.4381 | 7.4715  | 0.0000   | 1.1046  | 50.0000 | 1.5275 |
| 3   | 1  | 4                                                | 73.9544 | 12.4661 | 7.0000  | 0.0000   | 1.1046  | 0.0000  | 1.1880 |
| 4   | 1  | 4                                                | 89.3168 | 20.2660 | 7.5000  | 0.0000   | 1.1046  | 0.0000  | 1.5403 |
| 2   | 1  | 4                                                | 74.2929 | 31.0883 | 2.6184  | 0.0000   | 0.1000  | 0.0000  | 1.0500 |
| 1   | 2  | 4                                                | 0.0000  | 0.0019  | 6.3000  | 0.0000   | 0.0000  | 0.0000  | 1.0400 |
| 1   | 3  | 1                                                | 76.7840 | 44.2266 | 0.9343  | 0.0000   | 1.3483  | 0.0000  | 1.8301 |
| 1   | 3  | 3                                                | 63.9120 | 17.1680 | 0.8751  | 0.0000   | 0.0693  | 50.9415 | 3.0000 |
| 1   | 3  | 2                                                | 79.6413 | 28.6488 | 0.3789  | 0.0000   | 1.6776  | 0.0000  | 1.0010 |
| 2   | 3  | 2                                                | 85.8000 | 9.8453  | 2.2720  | 0.0000   | 2.8635  | 0.0000  | 1.5800 |
| 2   | 3  | 3                                                | 79.5453 | 45.0000 | 2.1630  | 0.0000   | 3.0000  | 0.0000  | 1.2391 |
| 3   | 3  | 3                                                | 80.7324 | 30.4554 | 0.9953  | 0.0000   | 1.6310  | 50.0000 | 1.0783 |
| 1   | 3  | 4                                                | 82.4890 | 31.4554 | 0.9953  | 0.0000   | 3.0000  | 0.0000  | 1.0783 |
| 3   | 3  | 4                                                | 84.3637 | 31.4554 | 0.9953  | 0.0000   | 3.0000  | 0.0000  | 1.0783 |
| 4   | 3  | 4                                                | 89.7071 | 31.4554 | 0.9953  | 0.0000   | 3.0000  | 0.0000  | 1.1519 |
| 2   | 3  | 4                                                | 75.6201 | 18.7919 | 0.9833  | 0.0000   | 0.1000  | 0.0000  | 1.0500 |

|   |   |   |          |         |        |          |        |        |        |
|---|---|---|----------|---------|--------|----------|--------|--------|--------|
| 1 | 4 | 1 | 81.4699  | 7.2318  | 1.2608 | 0.0000   | 3.0000 | 0.0000 | 1.2127 |
| 1 | 4 | 3 | 103.3204 | 33.0381 | 0.5787 | 0.0000   | 3.0000 | 0.0000 | 1.2127 |
| 1 | 4 | 4 | 50.0000  | 25.0250 | 4.7651 | 0.0000   | 3.0000 | 0.0000 | 1.2028 |
| 3 | 4 | 3 | 74.1978  | 42.1786 | 1.7845 | -18.0069 | 3.0000 | 0.0000 | 1.2127 |
| 3 | 4 | 4 | 74.8600  | 43.7354 | 1.1572 | -0.9193  | 3.0000 | 0.0000 | 1.2127 |
| 4 | 4 | 4 | 75.0538  | 14.8267 | 5.2794 | 0.0000   | 3.0000 | 0.0000 | 1.2127 |
| 1 | 4 | 2 | 68.2294  | 29.6576 | 1.0533 | 0.0000   | 0.3481 | 0.0000 | 1.5443 |
| 2 | 4 | 3 | 81.3686  | 40.0712 | 2.2396 | 0.0000   | 0.3481 | 0.0000 | 1.5443 |
| 2 | 4 | 4 | 83.0104  | 43.4766 | 1.5328 | 0.0000   | 0.3481 | 0.0000 | 1.5443 |
| 2 | 4 | 2 | 79.6336  | 17.7917 | 3.7832 | 0.0000   | 0.0222 | 0.0000 | 2.0238 |
| 1 | 2 | 3 | 0.0000   | 45.0000 | 3.0000 | 0.0000   | 1.0000 | 0.0000 | 1.0400 |
| 1 | 2 | 4 | 0.0000   | 0.0019  | 6.0000 | 0.0000   | 0.0000 | 0.0000 | 1.0400 |
| 1 | 2 | 5 | 0.0000   | 0.0019  | 6.0000 | 0.0000   | 0.0000 | 0.0000 | 1.0400 |
| 3 | 2 | 3 | 0.0000   | 15.0000 | 2.8900 | 0.0000   | 0.0000 | 0.0000 | 2.8774 |
| 3 | 2 | 4 | 0.0000   | 0.0019  | 6.0000 | 0.0000   | 0.0000 | 0.0000 | 1.0400 |
| 4 | 2 | 4 | 0.0000   | 0.0019  | 6.0000 | 0.0000   | 0.0000 | 0.0000 | 1.0400 |
| 2 | 2 | 3 | 0.0000   | 8.5744  | 3.0000 | 0.0000   | 0.0000 | 0.0000 | 1.0421 |
| 2 | 2 | 4 | 0.0000   | 0.0019  | 6.0000 | 0.0000   | 0.0000 | 0.0000 | 1.0400 |
| 1 | 1 | 5 | 74.4180  | 33.4273 | 1.7018 | 0.1463   | 0.5000 | 0.0000 | 1.6178 |
| 1 | 5 | 1 | 79.7037  | 28.2036 | 1.7073 | 0.1463   | 0.5000 | 0.0000 | 1.6453 |
| 2 | 1 | 5 | 63.3289  | 29.4225 | 2.1326 | 0.0000   | 0.5000 | 0.0000 | 3.0000 |
| 1 | 5 | 2 | 85.9449  | 38.3109 | 1.2492 | 0.0000   | 0.5000 | 0.0000 | 1.1000 |
| 1 | 5 | 5 | 85.6645  | 40.0000 | 2.9274 | 0.1463   | 0.5000 | 0.0000 | 1.3830 |
| 2 | 5 | 2 | 83.8555  | 5.1317  | 0.4377 | 0.0000   | 0.5000 | 0.0000 | 3.0000 |
| 2 | 5 | 5 | 97.0064  | 32.1121 | 2.0242 | 0.0000   | 0.5000 | 0.0000 | 2.8568 |
| 3 | 5 | 3 | 81.0926  | 30.2268 | 6.4132 | -5.4471  | 2.5968 | 0.0000 | 3.0000 |
| 1 | 5 | 3 | 70.0000  | 35.0000 | 3.4223 | 0.0000   | 1.3550 | 0.0000 | 1.2002 |
| 1 | 3 | 5 | 57.3353  | 41.0012 | 1.0609 | 0.0000   | 1.3000 | 0.0000 | 3.0000 |
| 3 | 3 | 5 | 83.9753  | 31.0715 | 3.5590 | 0.0000   | 0.8161 | 0.0000 | 1.1776 |
| 2 | 3 | 5 | 89.8843  | 17.5000 | 3.3660 | 0.0000   | 2.0000 | 0.0000 | 2.0734 |
| 2 | 6 | 2 | 0.0000   | 49.8261 | 0.2093 | 0.0000   | 2.0870 | 0.0000 | 2.2895 |
| 2 | 2 | 6 | 0.0000   | 40.0366 | 3.1505 | 0.0000   | 1.1296 | 0.0000 | 1.1110 |
| 6 | 2 | 6 | 0.0000   | 0.5047  | 0.8000 | 0.0000   | 0.8933 | 0.0000 | 4.6650 |
| 2 | 6 | 6 | 0.0000   | 8.7037  | 0.0827 | 0.0000   | 3.5597 | 0.0000 | 1.1198 |
| 3 | 6 | 3 | 0.0000   | 9.2317  | 0.1000 | 0.0000   | 1.0000 | 0.0000 | 1.0920 |
| 6 | 3 | 6 | 0.0008   | 25.0000 | 8.0000 | 0.0000   | 1.0000 | 0.0000 | 3.0000 |
| 2 | 3 | 6 | 66.0423  | 5.0000  | 1.0000 | 0.0000   | 1.0000 | 0.0000 | 1.2500 |
| 2 | 6 | 3 | 0.0000   | 0.5000  | 0.1000 | 0.0000   | 1.0000 | 0.0000 | 3.0000 |
| 3 | 3 | 6 | 70.0000  | 20.0000 | 1.0000 | 0.0000   | 1.0000 | 0.0000 | 1.2500 |
| 3 | 7 | 3 | 90.0000  | 18.4167 | 0.6799 | -8.0000  | 0.1310 | 0.0000 | 2.2321 |
| 2 | 3 | 7 | 72.6004  | 9.6150  | 0.8905 | 0.0000   | 3.5473 | 0.0000 | 1.0400 |
| 3 | 3 | 7 | 60.0000  | 40.0000 | 4.0000 | 0.0000   | 1.0000 | 0.0000 | 1.0400 |
| 3 | 2 | 7 | 0.0000   | 10.0000 | 1.0000 | 0.0000   | 1.0000 | 0.0000 | 1.0400 |
| 6 | 3 | 7 | 41.0995  | 3.2207  | 7.3523 | 0.0000   | 0.1101 | 0.0000 | 1.0947 |

|    |    |    |          |         |        |        |         |        |        |
|----|----|----|----------|---------|--------|--------|---------|--------|--------|
| 7  | 3  | 7  | 62.1312  | 7.5931  | 0.1000 | 0.0000 | 0.5154  | 0.0000 | 2.1744 |
| 1  | 3  | 7  | 74.1394  | 8.5687  | 1.7132 | 0.0000 | -0.6553 | 0.0000 | 2.2323 |
| 2  | 7  | 3  | 75.0000  | 25.0000 | 2.0000 | 0.0000 | 1.0000  | 0.0000 | 1.2500 |
| 3  | 7  | 7  | 70.0000  | 25.0000 | 2.0000 | 0.0000 | 1.0000  | 0.0000 | 1.2500 |
| 3  | 9  | 3  | 90.0000  | 30.4624 | 2.1468 | 0.0000 | 0.0500  | 0.0000 | 1.9485 |
| 9  | 3  | 9  | 90.0000  | 5.7486  | 5.0000 | 0.0000 | 2.0000  | 0.0000 | 1.1000 |
| 10 | 9  | 10 | 79.8775  | 32.7635 | 1.6551 | 0.0000 | 1.0510  | 0.0000 | 1.6270 |
| 9  | 10 | 9  | 28.5238  | 40.0000 | 5.0000 | 0.0000 | 2.0000  | 0.0000 | 1.1000 |
| 3  | 3  | 9  | 62.9344  | 15.0215 | 4.3743 | 0.0000 | 0.6168  | 0.0000 | 1.1673 |
| 3  | 9  | 9  | 33.7127  | 8.0623  | 3.4580 | 0.0000 | 0.0500  | 0.0000 | 2.6065 |
| 2  | 3  | 9  | 90.0000  | 9.7766  | 8.0000 | 0.0000 | 0.0505  | 0.0000 | 1.7257 |
| 1  | 3  | 9  | 47.6602  | 40.0000 | 9.9975 | 0.0000 | 1.6770  | 0.0000 | 1.5620 |
| 3  | 2  | 10 | 0.0000   | 0.5102  | 0.0100 | 0.0000 | 0.0000  | 0.0000 | 1.3399 |
| 11 | 1  | 11 | 77.8443  | 49.0744 | 5.9913 | 0.0000 | 0.7835  | 0.0000 | 2.3020 |
| 1  | 11 | 1  | 0.0000   | 19.9962 | 3.2299 | 0.0000 | 2.1012  | 0.0000 | 1.1537 |
| 1  | 11 | 11 | 0.0000   | 25.0000 | 1.0000 | 0.0000 | 1.0000  | 0.0000 | 1.0400 |
| 11 | 1  | 2  | 69.6421  | 10.0000 | 2.0000 | 0.0000 | 1.0000  | 0.0000 | 1.0400 |
| 1  | 9  | 1  | 79.0416  | 34.7981 | 2.4601 | 0.0000 | 4.4940  | 0.0000 | 4.0000 |
| 9  | 1  | 9  | 92.0437  | 39.9848 | 3.5810 | 0.0000 | 1.0016  | 0.0000 | 2.6458 |
| 1  | 9  | 3  | 8.4565   | 0.8893  | 1.9621 | 0.0000 | 2.1384  | 0.0000 | 3.6547 |
| 1  | 1  | 9  | 95.0000  | 35.4300 | 7.4753 | 0.0000 | 0.7434  | 0.0000 | 2.9506 |
| 1  | 9  | 11 | 67.4762  | 38.2782 | 4.9408 | 0.0000 | 0.1500  | 0.0000 | 1.8376 |
| 11 | 9  | 11 | 86.3838  | 39.7254 | 1.7723 | 0.0000 | 0.0500  | 0.0000 | 4.0000 |
| 9  | 11 | 9  | 20.0000  | 40.0000 | 5.0000 | 0.0000 | 0.6953  | 0.0000 | 1.5743 |
| 1  | 11 | 9  | 20.7615  | 38.6996 | 2.8535 | 0.0000 | 1.5402  | 0.0000 | 1.3906 |
| 3  | 9  | 11 | 120.0000 | 40.0000 | 1.1631 | 0.0000 | 2.0000  | 0.0000 | 1.1000 |
| 2  | 3  | 12 | 100.0000 | 1.0007  | 9.7740 | 0.0000 | 1.4276  | 0.0000 | 1.0000 |
| 12 | 3  | 12 | 98.5744  | 2.1499  | 1.6268 | 0.0000 | 3.7347  | 0.0000 | 2.8271 |
| 3  | 13 | 3  | 1.0000   | 6.7901  | 5.5000 | 0.0000 | 0.2366  | 0.0000 | 1.5936 |
| 2  | 3  | 13 | 100.0000 | 4.9629  | 8.0000 | 0.0000 | 0.1000  | 0.0000 | 1.0000 |
| 13 | 3  | 13 | 100.0000 | 8.0985  | 3.1295 | 0.0000 | 2.0000  | 0.0000 | 1.1755 |
| 3  | 13 | 10 | 54.0553  | 22.2701 | 8.0000 | 0.0000 | 2.3740  | 0.0000 | 2.0553 |
| 2  | 10 | 13 | 92.8098  | 7.7675  | 0.2250 | 0.0000 | 0.5870  | 0.0000 | 3.0000 |
| 9  | 3  | 13 | 76.5056  | 10.3180 | 0.9990 | 0.0000 | 0.7995  | 0.0000 | 1.0000 |
| 3  | 8  | 3  | 100.0000 | 40.0000 | 7.8728 | 0.0000 | 3.2930  | 0.0000 | 2.6836 |
| 2  | 3  | 8  | 82.0800  | 5.5605  | 8.0000 | 0.0000 | 1.4276  | 0.0000 | 1.6766 |
| 8  | 3  | 8  | 81.0000  | 4.7500  | 0.9000 | 0.0000 | 1.0000  | 0.0000 | 2.0000 |
| 8  | 3  | 9  | 81.3907  | 15.0000 | 3.0000 | 0.0000 | 1.5000  | 0.0000 | 1.8332 |
| 3  | 1  | 9  | 39.4706  | 40.0000 | 9.9991 | 0.0000 | 5.0000  | 0.0000 | 1.6832 |
| 9  | 11 | 11 | 90.0000  | 30.0000 | 5.0000 | 0.0000 | 1.0000  | 0.0000 | 1.1000 |
| 10 | 2  | 10 | 0.0000   | 5.0000  | 1.0000 | 0.0000 | 1.0000  | 0.0000 | 1.2500 |
| 10 | 10 | 10 | 0.0000   | 25.0000 | 1.0000 | 0.0000 | 1.0000  | 0.0000 | 1.2500 |
| 10 | 1  | 10 | 72.0864  | 22.4151 | 6.6934 | 0.0000 | 0.7328  | 0.0000 | 1.1557 |
| 1  | 10 | 1  | 0.0000   | 40.0000 | 4.8556 | 0.0000 | 2.5647  | 0.0000 | 1.4228 |

|    |                                                               |    |         |         |          |         |          |         |        |        |  |
|----|---------------------------------------------------------------|----|---------|---------|----------|---------|----------|---------|--------|--------|--|
| 1  | 10                                                            | 10 | 0.0000  | 25.0000 | 1.0000   | 0.0000  | 1.0000   | 0.0000  | 1.0400 |        |  |
| 2  | 1                                                             | 10 | 74.6486 | 33.8387 | 7.4888   | 0.0000  | 2.7096   | 0.0000  | 1.0000 |        |  |
| 60 | ! Nr of torsions;at1;at2;at3;at4;;V1;V2;V3;V2(BO);vconj;n.u;n |    |         |         |          |         |          |         |        |        |  |
| 1  | 1                                                             | 1  | 1       | 2.1207  | 26.8713  | 0.5160  | -9.0000  | -2.8394 | 0.0000 | 0.0000 |  |
| 1  | 1                                                             | 1  | 2       | 1.4658  | 44.1251  | 0.4411  | -5.3120  | -2.1894 | 0.0000 | 0.0000 |  |
| 2  | 1                                                             | 1  | 2       | 1.4787  | 40.5128  | 0.4396  | -5.2756  | -3.0000 | 0.0000 | 0.0000 |  |
| 1  | 1                                                             | 1  | 3       | 0.9963  | 17.2365  | 0.1491  | -2.5000  | -1.0000 | 0.0000 | 0.0000 |  |
| 2  | 1                                                             | 1  | 3       | 1.5159  | 28.6602  | 0.7169  | -7.5489  | -3.0000 | 0.0000 | 0.0000 |  |
| 3  | 1                                                             | 1  | 3       | -0.2000 | 23.6540  | -1.0000 | -5.9155  | -1.1552 | 0.0000 | 0.0000 |  |
| 1  | 1                                                             | 3  | 1       | 1.8231  | 46.5696  | -1.0000 | -3.0536  | -3.0000 | 0.0000 | 0.0000 |  |
| 1  | 1                                                             | 3  | 2       | 1.4836  | 80.0000  | 0.0363  | -4.7349  | -1.0000 | 0.0000 | 0.0000 |  |
| 2  | 1                                                             | 3  | 1       | 0.5983  | 49.5033  | 0.7210  | -3.4046  | -1.6880 | 0.0000 | 0.0000 |  |
| 2  | 1                                                             | 3  | 2       | -0.2000 | 76.3511  | 1.0000  | -4.0709  | -1.0000 | 0.0000 | 0.0000 |  |
| 1  | 1                                                             | 3  | 3       | -0.2000 | 5.0000   | -1.0000 | -3.6523  | -2.9000 | 0.0000 | 0.0000 |  |
| 2  | 1                                                             | 3  | 3       | 2.5000  | 80.0000  | 1.0000  | -2.6071  | -3.0000 | 0.0000 | 0.0000 |  |
| 3  | 1                                                             | 3  | 1       | -0.2000 | 80.0000  | -1.0000 | -3.6863  | -3.0000 | 0.0000 | 0.0000 |  |
| 3  | 1                                                             | 3  | 2       | 2.5000  | 38.8954  | -0.8368 | -4.6681  | -2.9000 | 0.0000 | 0.0000 |  |
| 3  | 1                                                             | 3  | 3       | -0.2000 | 78.1766  | 0.0250  | -2.8895  | -3.0000 | 0.0000 | 0.0000 |  |
| 1  | 3                                                             | 3  | 1       | 2.5000  | 0.1000   | 1.0000  | -2.6905  | -2.7573 | 0.0000 | 0.0000 |  |
| 1  | 3                                                             | 3  | 2       | 0.5241  | 69.2788  | -1.0000 | -4.4539  | -2.8081 | 0.0000 | 0.0000 |  |
| 2  | 3                                                             | 3  | 2       | 2.5000  | 0.1000   | -0.4869 | -2.8372  | -1.0000 | 0.0000 | 0.0000 |  |
| 1  | 3                                                             | 3  | 3       | 2.5000  | 0.1000   | 1.0000  | -3.4298  | -1.0000 | 0.0000 | 0.0000 |  |
| 2  | 3                                                             | 3  | 3       | -0.2000 | 0.1000   | -1.0000 | -3.5698  | -1.0000 | 0.0000 | 0.0000 |  |
| 3  | 3                                                             | 3  | 3       | -0.2000 | 0.1000   | 1.0000  | -3.8409  | -1.0000 | 0.0000 | 0.0000 |  |
| 0  | 1                                                             | 2  | 0       | 0.0000  | 0.0000   | 0.0000  | 0.0000   | 0.0000  | 0.0000 | 0.0000 |  |
| 0  | 2                                                             | 2  | 0       | 0.0000  | 0.0000   | 0.0000  | 0.0000   | 0.0000  | 0.0000 | 0.0000 |  |
| 0  | 2                                                             | 3  | 0       | 0.0000  | 0.1000   | 0.0200  | -2.5415  | 0.0000  | 0.0000 | 0.0000 |  |
| 0  | 1                                                             | 1  | 0       | 0.0000  | 50.0000  | 0.3000  | -4.0000  | -2.0000 | 0.0000 | 0.0000 |  |
| 0  | 1                                                             | 4  | 0       | 1.7932  | 141.5515 | 0.9686  | -4.2368  | -1.9727 | 0.0000 | 0.0000 |  |
| 0  | 2                                                             | 4  | 0       | -1.5000 | 0.1032   | 0.0100  | -5.0965  | 0.0000  | 0.0000 | 0.0000 |  |
| 0  | 3                                                             | 4  | 0       | 1.1397  | 61.3225  | 0.5139  | -3.8507  | -3.0000 | 0.0000 | 0.0000 |  |
| 0  | 4                                                             | 4  | 0       | 0.7265  | 44.3155  | 1.0000  | -4.4046  | -2.0000 | 0.0000 | 0.0000 |  |
| 4  | 1                                                             | 4  | 4       | -0.0949 | 8.7582   | 0.3310  | -7.9430  | -2.0000 | 0.0000 | 0.0000 |  |
| 0  | 1                                                             | 5  | 0       | 3.3423  | 30.3435  | 0.0365  | -2.7171  | 0.0000  | 0.0000 | 0.0000 |  |
| 0  | 5                                                             | 5  | 0       | -0.0555 | -5.0000  | 0.1515  | -2.2056  | 0.0000  | 0.0000 | 0.0000 |  |
| 0  | 2                                                             | 5  | 0       | 0.0000  | 0.0000   | 0.0000  | 0.0000   | 0.0000  | 0.0000 | 0.0000 |  |
| 2  | 3                                                             | 5  | 3       | 2.5000  | 2.5000   | 0.2237  | -10.0000 | -1.0000 | 0.0000 | 0.0000 |  |
| 0  | 3                                                             | 5  | 0       | -2.5000 | 50.0000  | -0.5000 | -10.0000 | -1.0000 | 0.0000 | 0.0000 |  |
| 0  | 6                                                             | 6  | 0       | 0.0000  | 0.0000   | 0.1200  | -2.4426  | 0.0000  | 0.0000 | 0.0000 |  |
| 0  | 2                                                             | 6  | 0       | 0.0000  | 0.0000   | 0.1200  | -2.4847  | 0.0000  | 0.0000 | 0.0000 |  |
| 0  | 3                                                             | 6  | 0       | 0.0000  | 0.0000   | 0.1200  | -2.4703  | 0.0000  | 0.0000 | 0.0000 |  |
| 1  | 1                                                             | 1  | 7       | -0.3232 | 14.3871  | 0.1823  | -9.8682  | -1.7255 | 0.0000 | 0.0000 |  |
| 7  | 1                                                             | 1  | 7       | -0.1452 | 50.0000  | -0.1915 | -8.0773  | -1.7255 | 0.0000 | 0.0000 |  |
| 0  | 1                                                             | 7  | 0       | 4.0000  | 45.8264  | 0.9000  | -4.0000  | 0.0000  | 0.0000 | 0.0000 |  |

|    |                                                  |    |    |         |         |         |          |         |        |        |
|----|--------------------------------------------------|----|----|---------|---------|---------|----------|---------|--------|--------|
| 0  | 7                                                | 7  | 0  | 4.0000  | 45.8264 | 0.9000  | -4.0000  | 0.0000  | 0.0000 | 0.0000 |
| 2  | 1                                                | 3  | 7  | -1.5000 | 18.9285 | 0.3649  | -6.1208  | 0.0000  | 0.0000 | 0.0000 |
| 2  | 3                                                | 7  | 3  | 1.5000  | -1.0000 | 0.2575  | -6.2100  | 0.0000  | 0.0000 | 0.0000 |
| 1  | 3                                                | 7  | 3  | -1.4375 | -0.8700 | 0.9861  | -2.5424  | 0.0000  | 0.0000 | 0.0000 |
| 7  | 3                                                | 7  | 3  | -1.5000 | 21.5086 | -1.0000 | -4.8869  | 0.0000  | 0.0000 | 0.0000 |
| 2  | 1                                                | 3  | 9  | 0.0000  | 84.3556 | 0.1000  | -3.1953  | 0.0000  | 0.0000 | 0.0000 |
| 1  | 1                                                | 3  | 9  | 0.0000  | 51.0461 | 0.1059  | -7.2043  | 0.0000  | 0.0000 | 0.0000 |
| 2  | 3                                                | 9  | 3  | -0.2500 | 0.0100  | -0.5000 | -4.6984  | 0.0000  | 0.0000 | 0.0000 |
| 1  | 1                                                | 1  | 11 | 0.5000  | 0.1000  | 0.4683  | -11.5274 | -1.7255 | 0.0000 | 0.0000 |
| 2  | 1                                                | 1  | 11 | 0.0000  | 49.3871 | 0.2000  | -10.5765 | -1.7255 | 0.0000 | 0.0000 |
| 11 | 1                                                | 1  | 11 | -0.5000 | 95.4727 | -0.2080 | -4.8579  | -1.7255 | 0.0000 | 0.0000 |
| 0  | 1                                                | 11 | 0  | 4.0000  | 45.8264 | 0.9000  | -4.0000  | 0.0000  | 0.0000 | 0.0000 |
| 0  | 11                                               | 11 | 0  | 4.0000  | 45.8264 | 0.8897  | -4.0000  | 0.0000  | 0.0000 | 0.0000 |
| 2  | 3                                                | 13 | 3  | 0.0918  | 64.5743 | -1.0000 | -4.4228  | 0.0000  | 0.0000 | 0.0000 |
| 1  | 1                                                | 1  | 1  | 0.0000  | 5.0000  | -0.2000 | -7.2626  | -2.0000 | 0.0000 | 0.0000 |
| 2  | 1                                                | 1  | 1  | 0.0000  | 46.5404 | -0.0659 | -8.0000  | -2.0000 | 0.0000 | 0.0000 |
| 1  | 1                                                | 1  | 1  | 0.0000  | 56.0716 | 0.1000  | -4.5000  | -2.0000 | 0.0000 | 0.0000 |
| 0  | 1                                                | 1  | 0  | 0.0000  | 45.8264 | 0.3000  | -4.0000  | 0.0000  | 0.0000 | 0.0000 |
| 0  | 1                                                | 1  | 0  | 0.0000  | 1.0000  | 0.1000  | -4.0000  | 0.0000  | 0.0000 | 0.0000 |
| 13 | ! Nr of hydrogen bonds;at1;at2;at3;Rhb;Dehb;vhb1 |    |    |         |         |         |          |         |        |        |
| 3  | 2                                                | 3  |    | 2.1200  | -3.5800 | 1.4500  | 19.5000  |         |        |        |
| 3  | 2                                                | 4  |    | 1.6787  | -3.9601 | 1.4500  | 19.5000  |         |        |        |
| 4  | 2                                                | 3  |    | 1.5585  | -3.9305 | 1.4500  | 19.5000  |         |        |        |
| 4  | 2                                                | 4  |    | 1.9336  | -5.8831 | 1.4500  | 19.5000  |         |        |        |
| 3  | 2                                                | 5  |    | 1.5000  | -2.0000 | 1.4500  | 19.5000  |         |        |        |
| 4  | 2                                                | 5  |    | 1.5000  | -2.0000 | 1.4500  | 19.5000  |         |        |        |
| 5  | 2                                                | 3  |    | 1.5000  | -2.0000 | 1.4500  | 19.5000  |         |        |        |
| 5  | 2                                                | 4  |    | 1.5000  | -2.0000 | 1.4500  | 19.5000  |         |        |        |
| 5  | 2                                                | 5  |    | 1.5000  | -2.0000 | 1.4500  | 19.5000  |         |        |        |
| 3  | 2                                                | 11 |    | 1.5033  | -0.0100 | 1.4500  | 19.5000  |         |        |        |
| 11 | 2                                                | 3  |    | 1.7547  | -0.2589 | 1.4500  | 19.5000  |         |        |        |
| 3  | 2                                                | 10 |    | 1.8833  | -3.6250 | 1.4500  | 19.5000  |         |        |        |
| 10 | 2                                                | 3  |    | 1.8487  | -0.0100 | 1.4500  | 19.5000  |         |        |        |
